# Supplementary material
Source: PubMed Central journal article supplement (PMC4610147)
Supplement: NIHMS722499-supplement.pdf [file NIHMS722499-supplement.pdf]

## INVENTORY OF SUPPLEMENTAL INFORMATION

**Figure S1, related to Figure 1.** *Phenotypes observed during primary and secondary screening.*

**Figure S2, related to Figure 2.** *IFT-A phenotypes in adult flies, and measure of RNAi efficiency.*

**Figure S3, related to Figure 3.** *Analyses of homozygous clones of IFT-A mutants.*

**Figure S4, related to Figure 4.** *In vivo epistasis experiments.*

**Figure S5, related to Figure 5.** *Rescue of adult viability of Axin KD flies by IFT-A KD and Axn<sup>E77</sup> MARCM clones.*

**Figure S6, related to Figure 6.** *Line scan quantification of cytoplasmic Arm levels in IFT-A KD and colocalization plots of IFT-A and Arm.*

**Table S1, related to Table 1.** *Adult phenotypes observed for each RNAi knockdown in the primary screen.*

**Experimental procedures.** *Antibodies, Transgenic flies and plasmids pUAS<sup>t</sup>-IFT122-myc and pUAS<sup>t</sup>-IFT43-myc, CRISPR mutant oseg4*

## References

Figure S1, related to Figure 1.

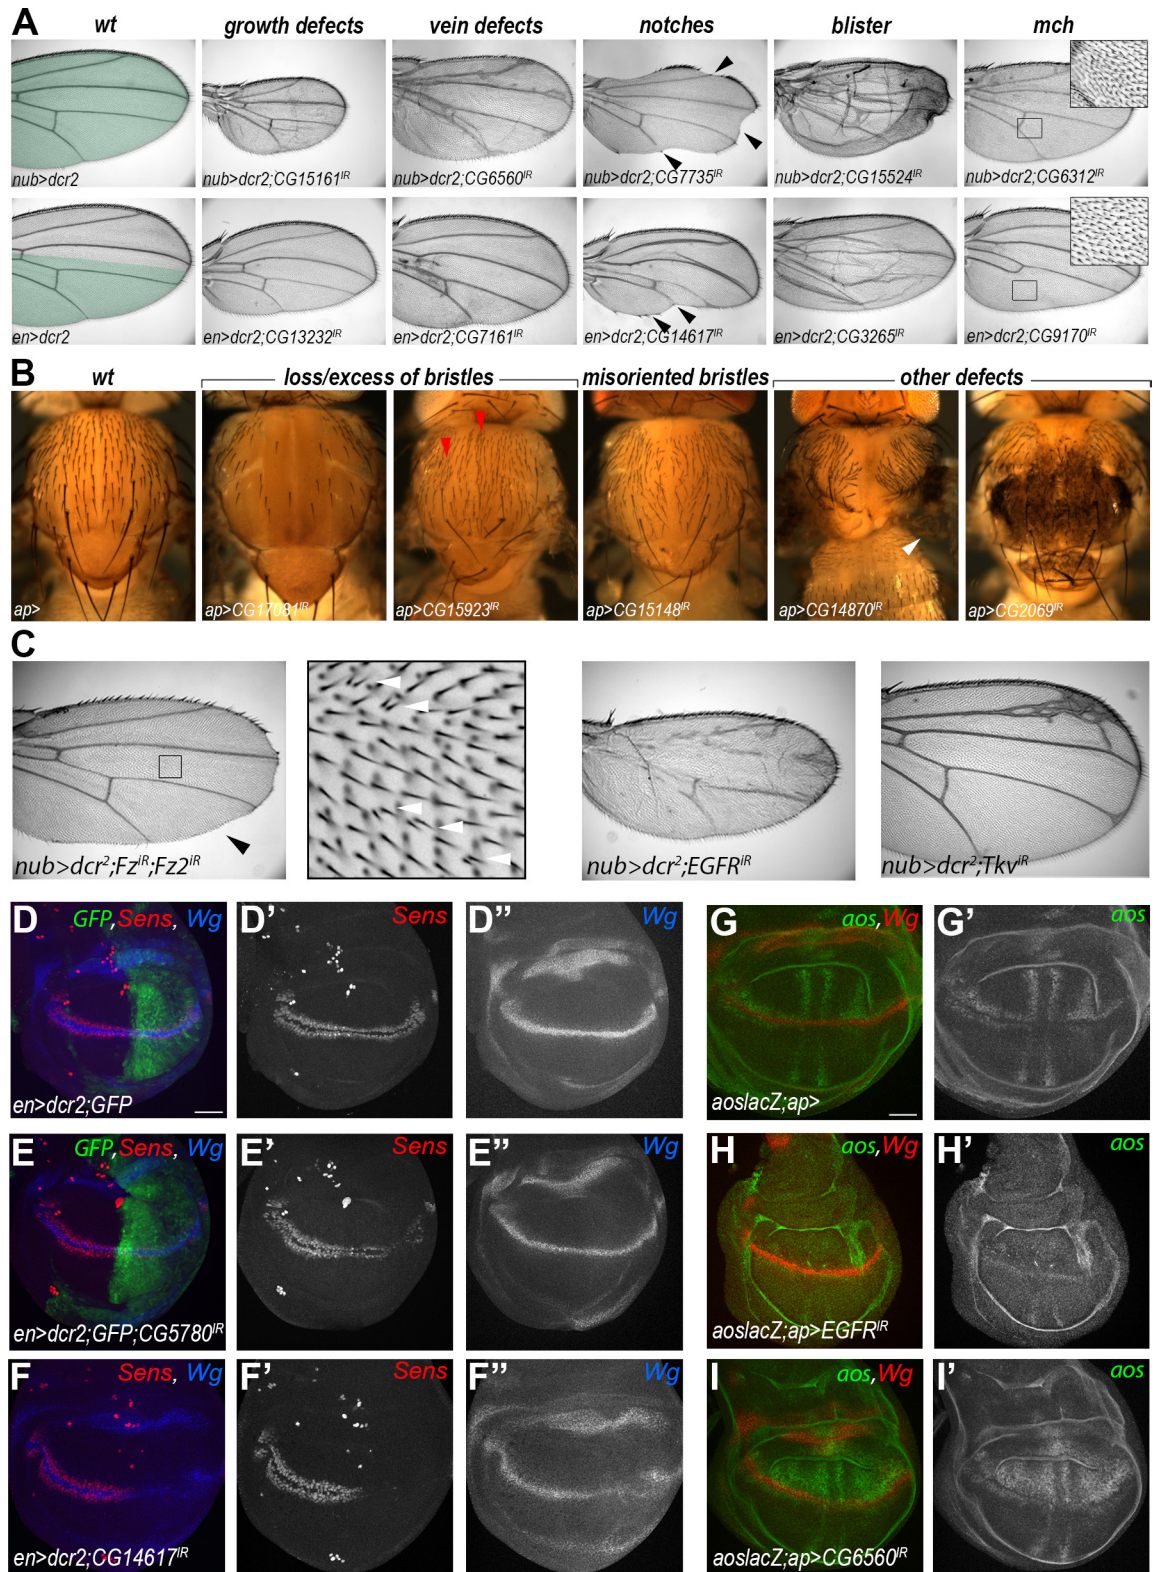

***Phenotypes observed during primary and secondary screening.***

(A-B) Examples of phenotypes of the primary screen: adult wings are oriented proximal to the left and anterior up; thorax orientation is anterior up.

(A) Examples of phenotypes observed in each category in the wing using *nubGal4* (*nub>*, expressed in the entire wing, domain highlighted in green in upper left panel) and *enGal4* (*en>*, expressed in the posterior compartment, highlighted in green in lower left panel), black arrowheads point toward notches; high magnification inserts in right most panels show examples of multiple cellular hair (mch) phenotypes (indicated by black square in full wing view). (B) Examples of phenotypes observed for each category in the thorax using *apGal4* (*ap>*, expressed in the entire notum).

(C) Phenotypes induced by knockdown of components of the different developmental signaling pathways using *nub>*, black arrowheads point toward notches, square in *fz/fz2* KD panel indicates area shown at high magnification next to the image displaying mch phenotypes (white arrowhead).

(D-I) Examples of phenotypes observed in the secondary screen, wing discs are oriented anterior left and dorsal up. (D) Wt patterns of Sens (red, monochrome in D') and Wg (blue, monochrome in D''), used as markers for activation of canonical Wg and Notch pathways, respectively, in flies expressing GFP under the control of *en>*. (E-F) Examples of CG5780-IR leading to disruption of Sens expression only (E), and CG14617-IR disrupting both Wg and Sens induction (F). (G) Wt pattern of the EGFR signaling as reported by *aos-lacZ* (green, monochrome in G') in flies expressing *apGal4*, Wg staining (red) is used to delimit the dorsal compartment (where *ap>* is expressed) and the wt ventral compartment. (H) Loss of EGFR via RNAi leads to loss of *aos-lacZ* expression in the dorsal compartment. (I) Example of RNAi against CG6560 causing an increase in *aos-lacZ* expression in our secondary screen. Scale bars in (D, G) represent 25µm.

**Figure S2, related to Figure 2**

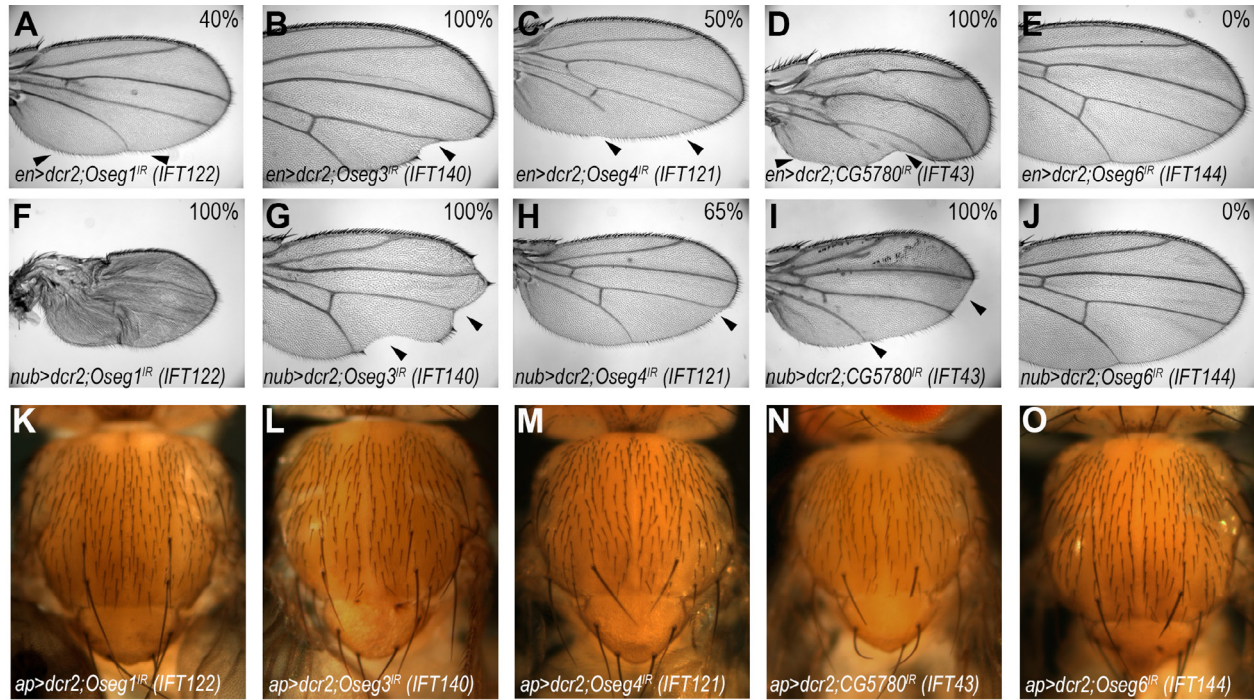

**P**

|                  |                   | CONTROLS  |                |                | IFT-A KD  |           |           |           |           |
|------------------|-------------------|-----------|----------------|----------------|-----------|-----------|-----------|-----------|-----------|
| HEDGEHOG PATHWAY |                   | w1118     | Smo-IR         | Ptc-IR         | IFT121-IR | IFT122-IR | IFT140-IR | IFT43-IR  | IFT144-IR |
| ap>GFP           | Ptc staining      | no effect | downregulation | downregulation | no effect |
|                  | Ci Staining       | no effect | downregulation | upregulation   | no effect |
| NOTCH PATHWAY    |                   | w1118     | Notch-IR       |                | IFT121-IR | IFT122-IR | IFT140-IR | IFT43-IR  | IFT144-IR |
| en>dcr2          | Wg staining       | no effect | downregulation |                | no effect |
|                  | NRE-GFP reporter  | no effect | downregulation |                | no effect |
| EGF PATHWAY      |                   | w1118     | EGFR-IR        |                | IFT121-IR | IFT122-IR | IFT140-IR | IFT43-IR  | IFT144-IR |
| ap>              | Aos-lacZ reporter | no effect | downregulation |                | no effect |

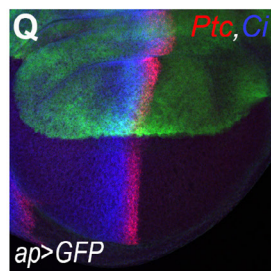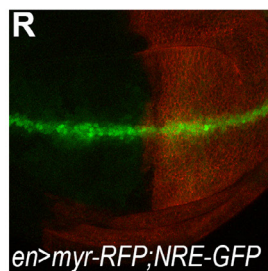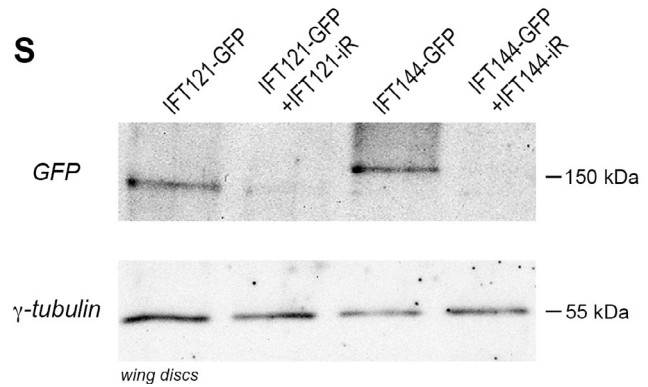

***IFT-A phenotypes in adult flies, and measure of RNAi efficiency.***

(A-J) Adult wing phenotypes induced by IFT-A component knockdowns via RNAi (IR) (n=30 per genotype). Percentages in upper right corner correspond to the percentage of flies observed with phenotype different from *wt* control wings in each experiment.

(A-E) *en*-driven *IFT122*-IR (A), *IFT140*-IR (B), *IFT121*-IR (C) and *IFT43*-IR (D) induce margin defects, as exemplified by notches and/or loss of wing margin bristles (black arrowheads) and weak growth and vein defects, *IFT144*-IR (E) resembles *wt* (100%). (F-J) *nub*-driven *IFT122*-IR (F) displays growth defects and *IFT140*-IR (G), *IFT121*-IR (H), and *IFT43*-IR (I) knockdowns show notches (black arrowheads) and growth defects, *nub>IFT144*-IR again resembles *wt* (J). (K-O) The respective IFT-A knockdowns in the thorax using *apGal4* resemble wild-type.

(P) Summary table of the different molecular target genes tested for the respective developmental signaling pathway, as indicated on left. In addition to testing Ptc and Wg staining in the secondary screen, IFT-A KD showed no effect on Ci (Hh signaling) and *NRE-GFP* (Notch signaling), compared to the controls. (Q) Wt expression patterns of Ci and Ptc and (R) *NRE-GFP*.

(S) Western Blot of 3<sup>rd</sup> instar wing disc lysates of *IFT121*-GFP and *IFT144*-GFP in a *wt* background, and the respective RNAi conditions as indicated showing specific silencing of each RNAi line for the respective IFT-A component (n=50 wing discs/genotype, experiment was repeated twice with the same result). *nub-Gal4* was used to express the GFP-tagged IFT-A proteins throughout wing discs, either alone or in combination with the respective RNAi construct (as indicated), and changes in protein levels were monitored. RNAi targeting of both genes reduced their protein expression to barely detectable levels, indicating that *IFT144* is efficiently silenced.

**Figure S3, related to Figure 3.**

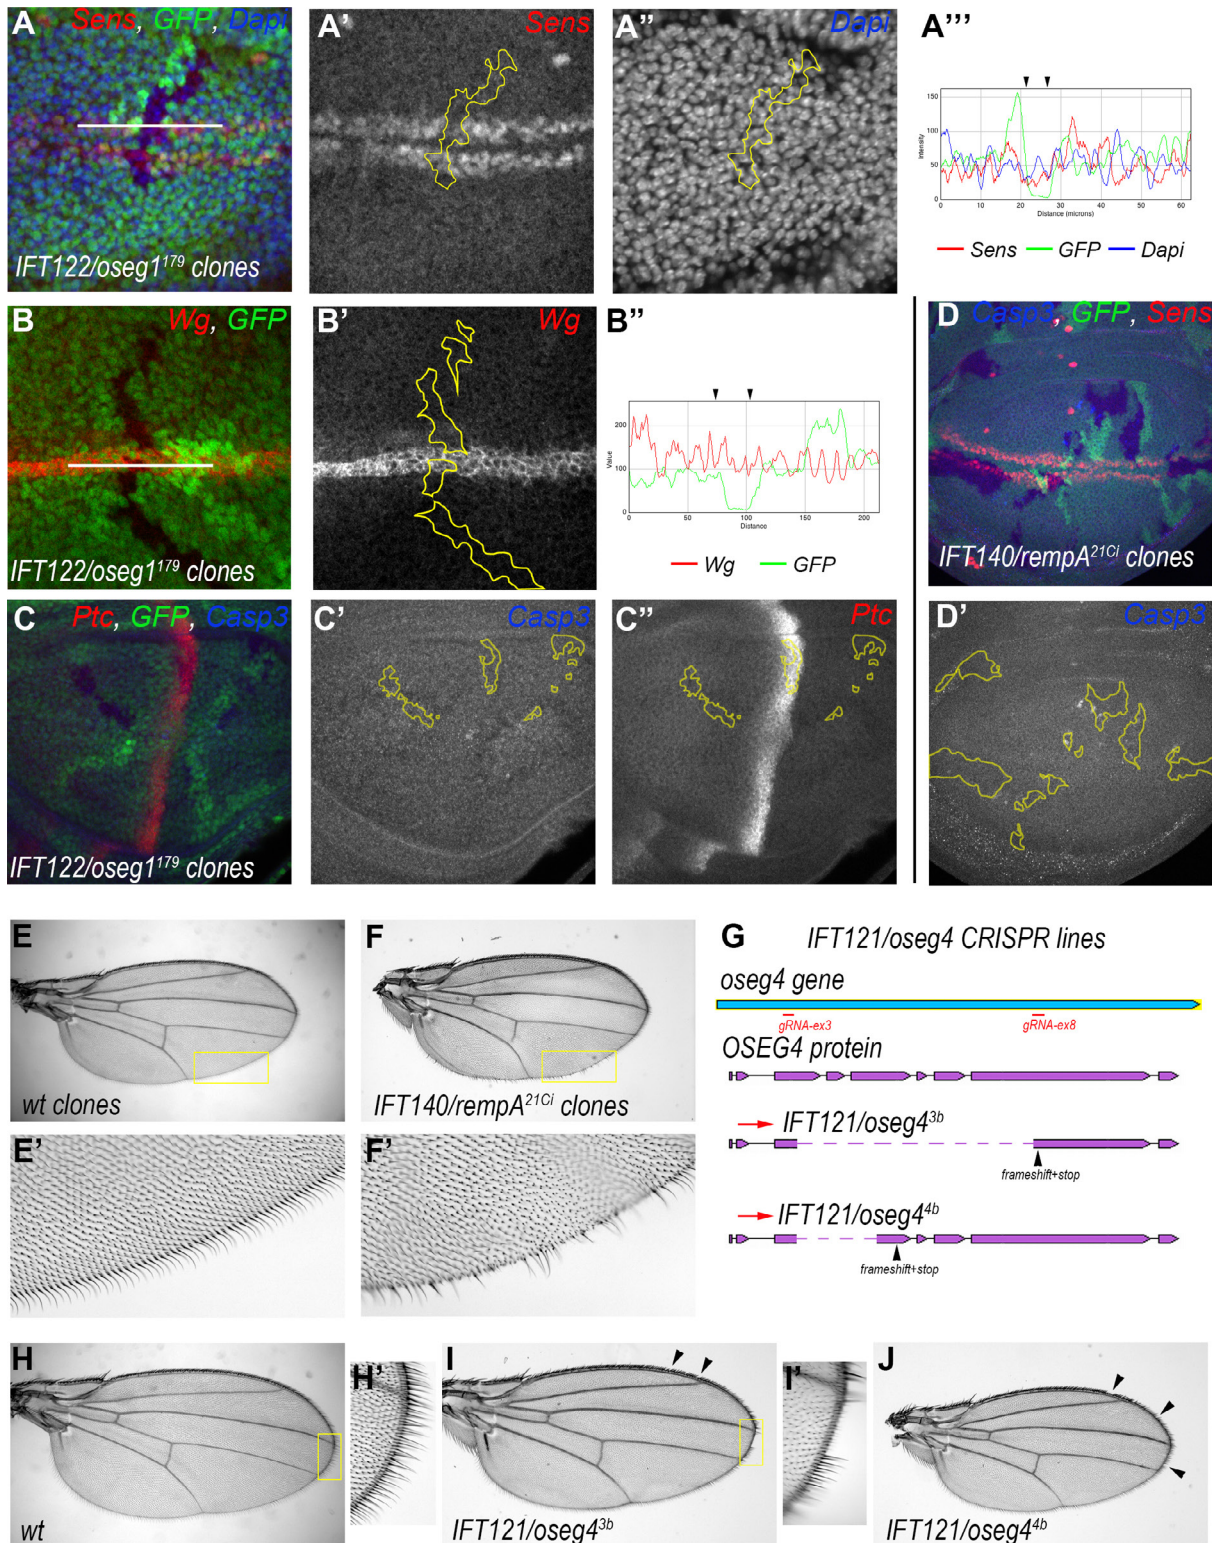

### ***Analyses of homozygous clones of IFT-A mutants.***

**(A-B)** Expression of Wg signaling targets Sens and Dll is reduced in *IFT122/oseg1<sup>179</sup>* mutant cells, whereas expression of the Notch target Wg remains unaffected. **(A)** *IFT122/oseg1<sup>179</sup>* cells (marked by absence of GFP) display reduced levels of nuclear Sens (red, monochrome in **A'**; nuclei are counterstained with Dapi: blue, monochrome in **A''**). Quantification line profiling in **A'''** (line profile/image field as indicated in **A**). **(B-C)** Other signaling pathways are not disrupted by loss of *IFT122*. **(B)** Notch signaling is unaffected in *IFT122/oseg1<sup>179</sup>* (marked by absence of GFP). **(B'')** Line scan of Wg staining, note that Wg expression is not affected within the *IFT122* mutant cells (borders of mutant clone are indicated by black arrowheads above line scan; note loss of GFP in area between arrowheads). **(C)** Hedgehog pathway activity, as indicated by Ptc expression (red in **C**, monochrome in **C''**, note mutant clone within the Ptc expression domain), remains unchanged in *IFT122* mutant cells. **(C-D')** Cleaved Casp3 staining (blue in **C** and **D**; monochrome in **C'** and **D'**) in *IFT122* and *IFT140* mutant cells, respectively (genotypes and other labels as indicated). Panel **D** shows same wing area as in **Fig. 3C** in main text. Cleaved Caspase3 staining is occasionally detected in cells at the borders of mutant clones, similar to observations in Wg pathway mutant clones (see main text for reference to previous Wg-signaling studies).

**(E-F)** *IFT140/rempeA<sup>21Ci</sup>* clones (**F-F'**) in adult wings show disruption of the margin bristle pattern, compared to the control wing (**E-E'**), yellow rectangles in **E** and **F** indicate higher magnification field of the wing margin shown in **E'** and **F'**.

**(G)** Schematic representation of the strategy and sequence analysis of CRISPR generated *IFT121/oseg4* mutant lines. Allele/line 3b contains a deletion of exon 3 to exon 8 and insertion of few nucleotides at the breakpoint during DNA repair induced a frameshift and early stop codon in exon 8. Mutant allele/line 4b contains a deletion of exon 3 to exon 5 and insertion of few nucleotides at the breakpoint during DNA repair induced a frameshift and early stop codon in exon 5.

**(H-J)** *IFT121/oseg4<sup>3b</sup>* (**I**) and *IFT121/oseg4<sup>4b</sup>* (**J**) homozygous adult flies show mild disruptions at the wing margin (black arrowheads), compared to *wt* wing (**H**), yellow rectangles indicate higher magnification fields shown in **H'** and **I'**.

Figure S4, related to Figure 4.

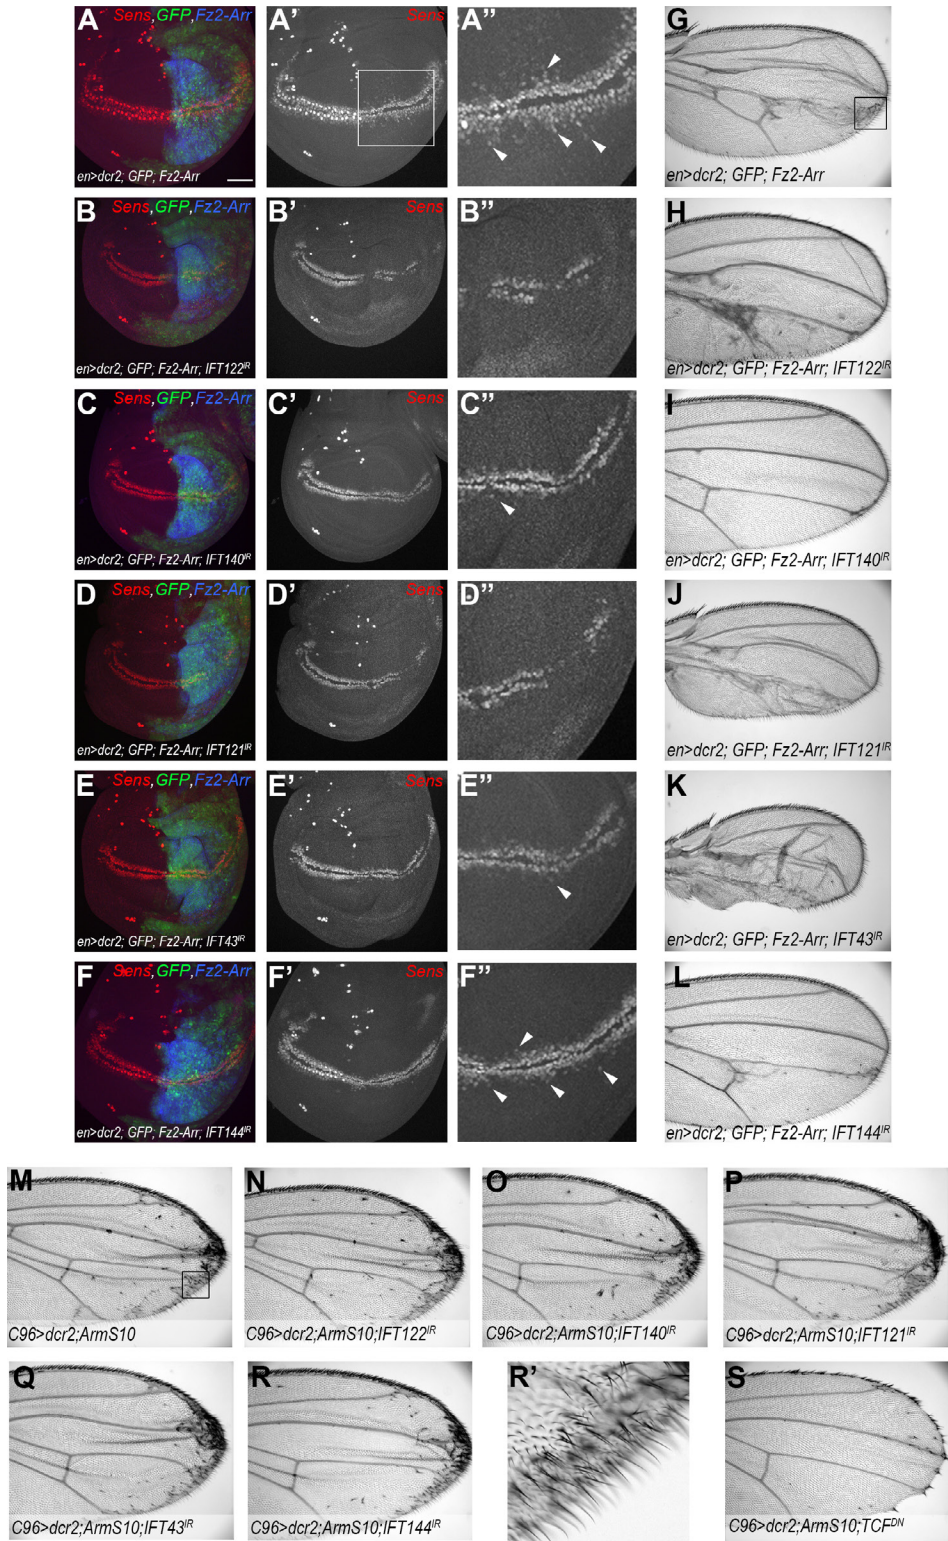



### ***In vivo* epistasis experiments.**

(A-L) Co-expression of UAS-Fz2-Arr and IFT-A RNAis using *enGal4* in 3<sup>rd</sup> instar wing discs and adult wings.

(A) Extra Sens positive cells (red, monochrome in A', A'') are observed in the posterior compartment of *en>Fz2-Arr-myc* expressing 3<sup>rd</sup> instar wing discs (examples indicated with white arrowheads), GFP (green) and Fz-Arr (blue, marked with anti-myc) expression indicate the posterior compartment. White square (A') delimits the area shown at high magnification in A''. (B-F) The induction of extra Sens positive cells is suppressed by *IFT122-IR* (B-B''), *IFT140-IR* (C-C''), *IFT121-IR* (D-D'') and *IFT43-IR* (E-E'') knockdowns, but not by *IFT144-IR* (F-F'') (n $\geq$ 20 per genotype). (G) In adult wings, the induction of extra Sens positive cells is reflected by the formation of extra margin bristles on the wing blade in the posterior compartment of Fz2-Arr expressing flies, black square indicates the areas shown at high magnification in main text **Figure 4A-F**.

(H-L) Formation of extra bristles is suppressed by the RNAi-based silencing of IFT122 (H), IFT140 (I), IFT121 (J), and IFT43 (K), but not IFT144 (L), correlating with Sens staining in larval wing discs. Note the resemblance between the morphology of the posterior compartment in IFT-A RNAi alone (Figure S2A-D) or in combination with Fz2-Arr (H-K), indicating that IFT-A components act downstream of the receptor complex. Quantification of the extra bristle phenotype is shown in main text **Figure 4G**.

(M-S) Adult wing images of *C96>ArmS10* alone (M; box indicates area used for quantification and shown at higher magnification in main text **Figure 4H-M**) or together with KD of *IFT-122* (N), *IFT140* (O), *IFT121* (P), *IFT43* (Q), *IFT144* (R, shown at high magnification in R'), and TCF<sup>DN</sup> (S). IFT-A KDs do not suppress the extra-bristle phenotype induced by the expression of ArmS10, whereas TCF<sup>DN</sup> does.

**Figure S5, related to Figure 5.**

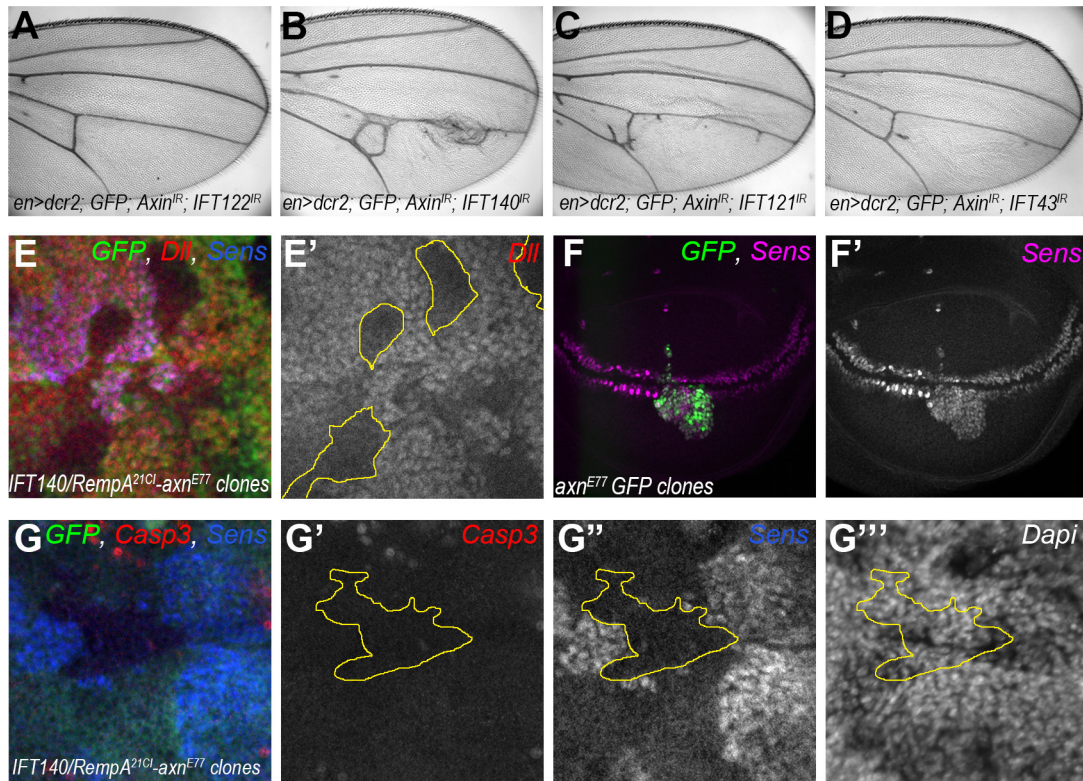

**Rescue of adult viability of Axin KD flies by IFT-A KD and Axn<sup>E77</sup> MARCM clones.**

(A-D) Axin-IR adult viability is rescued to almost *wt* when co-expressed with *IFT122*-IR (A), *IFT140*-IR (B), *IFT121*-IR (C), and *IFT43*-IR (D)(all expressed under *en-Gal4* control).

(E-E') Overactivation of Dll expression (red, monochrome in E') is rescued in *IFT140/remA<sup>21Ci</sup>, axn<sup>E77</sup>* double mutant clones (marked by absence of GFP; similarly to Sens (Fig. 5H')), when compared to *axn<sup>E77</sup>* single mutant clones. Note that only double mutant clones lack GFP, single mutant *axn<sup>E77</sup>* clones show increased Dll expression, while single mutant *IFT140/remA<sup>21Ci</sup>* clones show reduced Dll levels.

(F-F') *axn<sup>E77</sup>* MARCM clones (marked by GFP expression) display overactivation of Sens (magenta, monochrome in F').

(G-G''') Cleaved-Caspase3 staining (red, monochrome in G') and Sens staining (blue, monochrome in G'') in *IFT140/remA<sup>21Ci</sup>, axn<sup>E77</sup>* double mutant clones; note that Sens overactivation is suppressed in cells of the double mutant clone (outlined with yellow line in G'-G'''); Dapi stains all nuclei in G''').

Figure S6, related to Figure 6

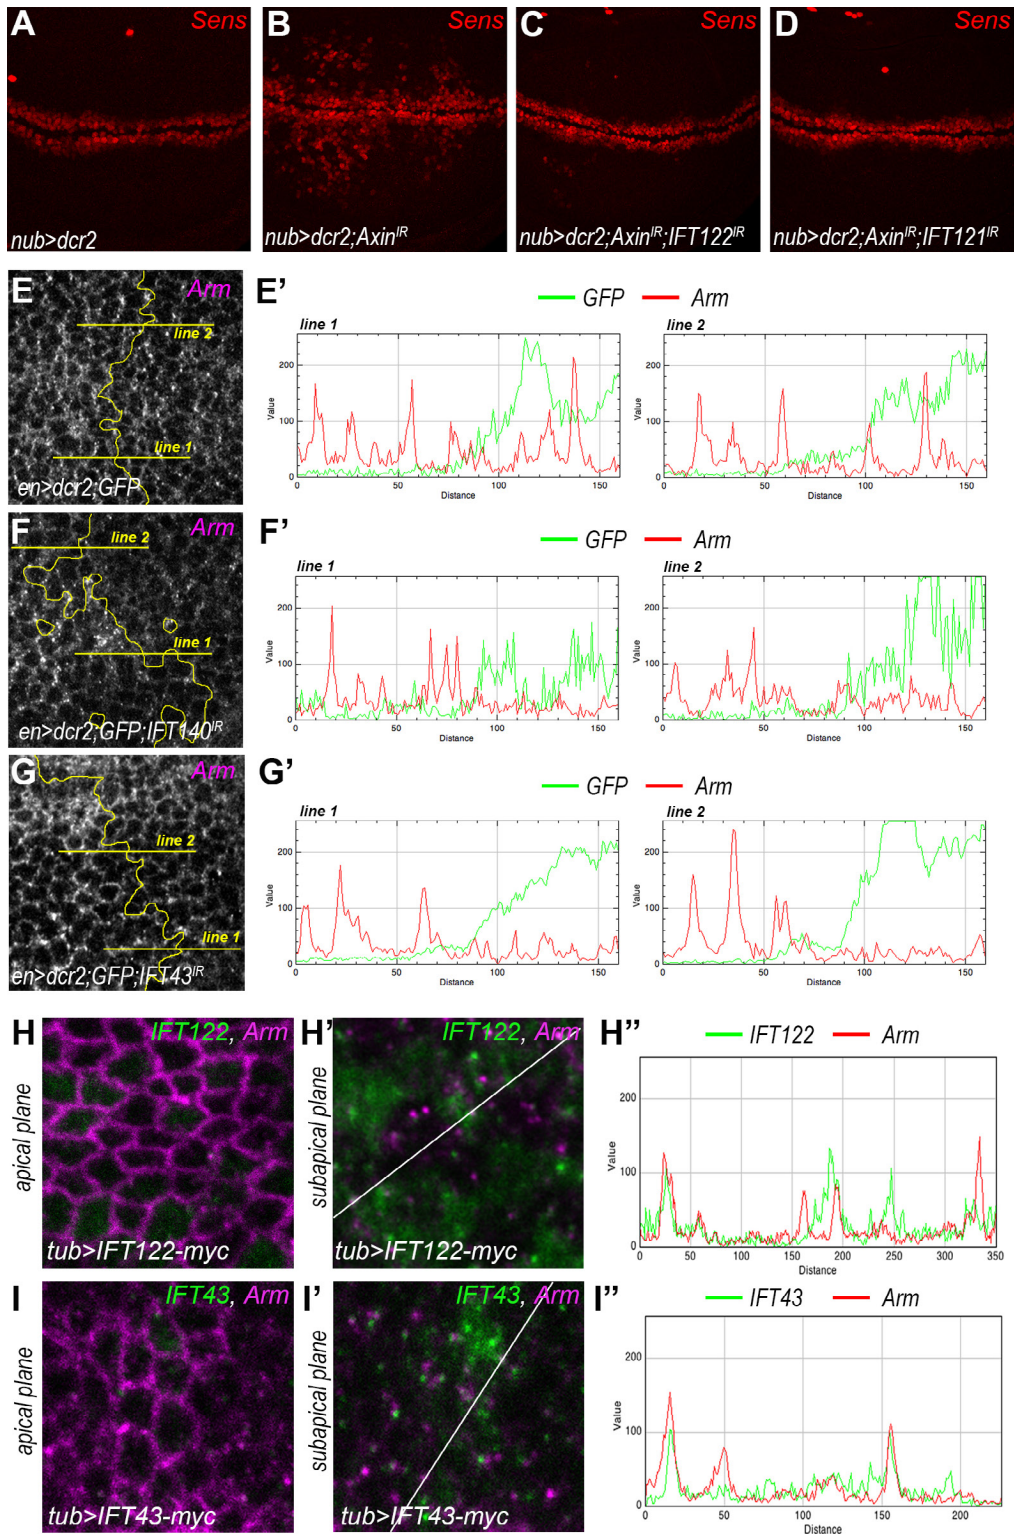

***Line scan quantification of cytoplasmic Arm levels in IFT-A KD and colocalization plots of IFT-A and Arm***

(A) Wt pattern of Sens (red) in flies expressing *nub>dcr2*. (B) Ectopic Sens positive cells are induced by *nub*-driven *Axin*-IR mediated KD, compared to *wt* in A (note that the effect is milder than with *en-Gal4* (main text **Fig. 5A**) and Sens is not activated in all cells of the wing pouch expressing *nub*. (C-D). Suppression of ectopic Sens positive cell phenotype in *nub*-driven *Axin*-IR KD with co-expression of RNAi to *IFT122* (C) or *IFT121* (D).

(E-G) Quantification of cytoplasmic Arm levels. Confocal images in E-G are the same as in the main text **Fig. 6C'-E'**. Yellow lines indicate the line scan plotted in E'-G'. Note that peaks of cytoplasmic Arm are reduced in posterior GFP-positive regions (respectively IFT140 KD in F' and IFT43 KD in G') compared to the anterior GFP-negative region and to the *wt* control in E'.

(H-I) Confocal scans of apical and subapical planes of *tub*-driven expression of IFT122-myc (H-H') and IFT43-myc (I-I') (green) and Arm (magenta; note that Arm staining labels the junctions in the apical planes and shows a punctate distribution in subapical areas, wing disc areas are the same as shown in main text **Fig. 6H-I**). White line indicates region/line shown in line plot of fluorescence intensity in H'' and I'', note that several peaks of Arm and IFT-A-myc staining are superimposed, indicating that both proteins can colocalize.

**Table S1, related to Table 1.**

***Adult phenotypes observed for each RNAi knockdown in the primary screen.***

| Vertebrate gene name | Drosophila ortholog | RNAi line #                          | Phenotypic classes       |                           | Additional line #     | RNAi |
|----------------------|---------------------|--------------------------------------|--------------------------|---------------------------|-----------------------|------|
|                      |                     |                                      | WING                     | THORAX                    |                       |      |
| BBS1                 | CG14825, BBS1       | <sup>v</sup> 109623                  | wt                       | wt                        | NA                    |      |
| BBS3, ARL6           | CG7735              | <sup>v</sup> 104462                  | growth, notch, vein      | wt                        | <sup>v</sup> 43508    |      |
| BBS4                 | CG13232, BBS4       | <sup>v</sup> 100571                  | growth, notch, mch       | wt                        | <sup>v</sup> 28772    |      |
| BBS5                 | CG1126              | <sup>v</sup> 18200                   | growth                   | loss                      | NA                    |      |
| BBS8                 | CG13691, BBS8       | <sup>v</sup> 32058                   | wt                       | wt                        | NA                    |      |
| BBS9                 | CG15666             | <sup>v</sup> 40013                   | growth (notch)           | wt                        | <sup>v</sup> 110798   |      |
| MKS1                 | CG15730             | <sup>v</sup> 19582                   | wt                       | wt                        | <sup>v</sup> 19583    |      |
| MKS3                 | CG15923             | <sup>v</sup> 37373; <sup>MS</sup> 54 | growth, vein, mch        | excess                    | <sup>v</sup> 107011   |      |
| TCTN1/2/3            | CG42731, tectonic   | <sup>v</sup> 107952                  | wt                       | other                     | NA                    |      |
| B9D1                 | CG14870             | <sup>v</sup> 107330                  | growth                   | other                     | <sup>v</sup> 46307    |      |
| B9D2                 | CG42730             | <sup>v</sup> 40858                   | wt                       | wt                        | NA                    |      |
| NPHP6, CEP290        | CG13889             | NA                                   |                          |                           |                       |      |
| NPHP9, NEK8          | CG10951, niki       | <sup>v</sup> 100823                  | wt                       | wt                        | <sup>v</sup> 16120    |      |
| CC2D2A, CEP76        | CG18631             | <sup>v</sup> 100302                  | vein                     | Lethal                    | <sup>v</sup> 47215    |      |
| IFT20                | CG30441             | <sup>v</sup> 106811                  | wt                       | wt                        | <sup>v</sup> 50583    |      |
| IFT46                | CG15161             | <sup>d</sup> 15161R-1                | Growth                   | wt                        | <sup>v</sup> 25198    |      |
| IFT52                | CG9595, osm-6       | <sup>v</sup> 24068                   | wt                       | wt                        | NA                    |      |
| IFT54                | CG3259              | <sup>v</sup> 46163                   | Growth, vein             | (loss)                    | NA                    |      |
| IFT57                | CG8853, che-13      | <sup>v</sup> 106927                  | wt                       | wt                        | <sup>v</sup> 51323    |      |
| IFT70, FLEER         | CG5142              | <sup>v</sup> 22015                   | growth, vein, mch        | (misoriented, loss)       | <sup>v</sup> 110166   |      |
| IFT80                | CG9333, Oseg5       | <sup>v</sup> 100020                  | growth, vein, notch      | loss                      | <sup>v</sup> 52551    |      |
| IFT88                | CG12548, nompB      | <sup>v</sup> 104419                  | wt                       | lethal                    | <sup>t</sup> JF0380   |      |
| IFT172               | CG13809, osm-1      | <sup>v</sup> 107157                  | growth, vein, notch, mch | (loss)                    | <sup>v</sup> 24795    |      |
| KIF3A                | CG10642, Klp64D     | <sup>v</sup> 103358                  | wt                       | lethal                    | <sup>v</sup> 45373    |      |
| KIF3B                | CG7293, Klp68D      | <sup>t</sup> JF03346                 | growth, vein (notch)     | (misoriented)             | <sup>v</sup> 101058   |      |
| KIF17                | CG17461, Kif3C      | <sup>v</sup> 43641                   | wt                       | wt                        | NA                    |      |
| KIFAP3               | CG11759, Kap3       | <sup>v</sup> 103548                  | vein (notch)             | wt                        | <sup>v</sup> 45400    |      |
| IFT121, WDR35        | CG2069, oseg4       | <sup>v</sup> 109805                  | Vein, notch              | (misoriented)             | <sup>v</sup> 43380    |      |
| IFT122               | CG7161, oseg1       | <sup>v</sup> 103598                  | growth, vein             | wt                        | <sup>d</sup> 7161R-1  |      |
| IFT140               | CG11838, rempA      | <sup>v</sup> 31575                   | growth (notch)           | wt                        | <sup>v</sup> 103424   |      |
| IFT144, WDR19        | CG11237, oseg6      | <sup>v</sup> 38462                   | wt                       | wt                        | <sup>t</sup> GLC01452 |      |
| IFT43                | CG5780              | <sup>v</sup> 106366                  | growth, vein, notch      | wt                        | NA                    |      |
| DYNCH2H1             | CG15148, btv        | <sup>t</sup> JF03010                 | Growth, vein             | misoriented               | <sup>v</sup> 105152   |      |
| DYNC2LI1             | CG3769              | <sup>v</sup> 40469                   | blister                  | wt                        | <sup>v</sup> 109621   |      |
| DYNLL1               | CG6998, ctp         | <sup>v</sup> 109084                  | growth (notch)           | misoriented, loss (other) | <sup>v</sup> 43116    |      |
| ARL13B               | CG11356             | <sup>v</sup> 33812                   | notch                    | wt                        | NA                    |      |
| PKD2                 | CG6504, pkd2        | <sup>v</sup> 110681                  | wt                       | wt                        | <sup>t</sup> JF01468  |      |
| OFD1                 | CG1501, unc         | <sup>t</sup> JF03403                 | growth                   | wt                        | NA                    |      |
| TULP3                | CG9398, king-tubby  | <sup>v</sup> 29110                   | vein                     | wt                        | NA                    |      |
| CCDC104              | CG14367             | <sup>v</sup> 100799                  | notch                    | (loss)                    | NA                    |      |
| EFHC1                | CG11048, Efch1.2    | <sup>v</sup> 106676                  | wt                       | wt                        | <sup>v</sup> 31407    |      |
| CLUAP1               | CG17599             | <sup>v</sup> 14682                   | growth                   | loss, misoriented         | <sup>d</sup> 17599R-1 |      |
| TTC26                | CG4525              | <sup>v</sup> 107708                  | vein                     | misoriented               | <sup>d</sup> 4525R-2  |      |
| CEP164               | CG9170              | <sup>v</sup> 108727                  | wt                       | wt                        | <sup>v</sup> 29066    |      |
| EB1                  | CG3265, Eb1         | <sup>v</sup> 24451                   | vein                     | misoriented, loss         | <sup>t</sup> HM05093  |      |
| IMPORTIN β           | CG2637, Fs(2)ket    | <sup>v</sup> 107622                  | Lethal                   | Lethal                    | <sup>t</sup> JF01755  |      |
| RFX                  | CG6312, rfx         | <sup>v</sup> 10416                   | growth, mch              | wt                        | <sup>t</sup> JF02518  |      |
| Pericentrin          | CG33957, cp309      | <sup>v</sup> 100969                  | growth                   | misoriented               | <sup>v</sup> 101645   |      |
| SAS-6                | CG15524, sas-6      | <sup>v</sup> 25073                   | vein                     | loss                      | <sup>v</sup> 110149   |      |
| ROOTLETIN            | CG6129, rootletin   | <sup>d</sup> 6129R-1                 | growth, vein             | loss, other               | <sup>v</sup> 110171   |      |
| ARL3                 | CG6560, dnd         | <sup>v</sup> 104311                  | growth, vein, mch, notch | loss, misoriented         | <sup>t</sup> JF02638  |      |
| RAB8                 | CG8287, rab8        | <sup>v</sup> 28092                   | wt                       | wt                        | <sup>t</sup> JF02669  |      |

|                                                                                                                                                                       |                    |                                          |                     |                        |                              |
|-----------------------------------------------------------------------------------------------------------------------------------------------------------------------|--------------------|------------------------------------------|---------------------|------------------------|------------------------------|
| LRCC16A                                                                                                                                                               | CG1399             | <sup>v</sup> 24826                       | wt                  | wt                     | NA                           |
| OSCP1                                                                                                                                                                 | CG13178            | <sup>v</sup> 110148                      | wt                  | (misoriented, loss)    | <sup>v</sup> <b>44816</b>    |
| CEP192                                                                                                                                                                | CG17286, spd-2     | <sup>v</sup> 36623                       | vein                | wt                     | <sup>v</sup> 101882          |
| CEP152                                                                                                                                                                | CG2919, asl        | <sup>v</sup> 25457                       | wt                  | (loss)                 | <sup>t</sup> <b>HMS01463</b> |
| γ-TUBULIN                                                                                                                                                             | CG17566, γ-Tub37C  | <sup>v</sup> 109921                      | wt                  | wt                     | <sup>t</sup> <b>HMS00517</b> |
| SAK/PLK4                                                                                                                                                              | CG7186, Sak        | <sup>v</sup> 105102                      | (vein)              | wt                     | <sup>v</sup> 27904           |
| SAS-4                                                                                                                                                                 | CG10061, sas-4     | <sup>v</sup> 106051                      | growth (notch)      | (misoriented, loss)    | <sup>t</sup> <b>HMS01463</b> |
| CP110                                                                                                                                                                 | CG14617, cp110     | <sup>v</sup> 101161                      | notch               | other                  | <sup>v</sup> 24874           |
| CENTRIN                                                                                                                                                               | CG17493            | <sup>v</sup> 40080                       | wt                  | wt                     | NA                           |
| CEP135                                                                                                                                                                | CG17081, cep135    | <sup>v</sup> 14194                       | wt                  | loss                   | NA                           |
| TEKT1                                                                                                                                                                 | CG10541, tektin-C  | <sup>v</sup> 100094                      | lethal              | lethal                 | <sup>v</sup> <b>31253</b>    |
| <b>Developmental pathway specific controls</b>                                                                                                                        |                    |                                          |                     |                        |                              |
|                                                                                                                                                                       | Frizzled/Frizzled2 | <sup>v</sup> 43075; <sup>t</sup> JF01259 | growth, notch, mch  | misoriented            |                              |
|                                                                                                                                                                       | Notch              | <sup>v</sup> 27228                       | growth, notch, vein | loss/excess            |                              |
|                                                                                                                                                                       | Smoothened         | <sup>t</sup> JF02363                     | growth, vein        | wt                     |                              |
|                                                                                                                                                                       | EGFR               | <sup>t</sup> JF01368                     | growth, vein        | other                  |                              |
|                                                                                                                                                                       | Thickvein          | <sup>t</sup> JF01486                     | growth, vein        | wt                     |                              |
| <b>Cilia-associated genes not considered in our study as their degree of conservation was not determined by standard sequence alignments using NCBI protein blast</b> |                    |                                          |                     |                        |                              |
| BBS2                                                                                                                                                                  | BBS6               | BBS7                                     | BBS10               | BBS11                  | BBS12                        |
| NPHP1                                                                                                                                                                 | NPHP3              | NPHP4                                    | NPHP5               | NPHP7, GLIS2           | NPHP8, RPGRIP1L              |
| AHI1                                                                                                                                                                  | IFT22              | IFT25/HSBP11                             | IFT27               | IFT71/72/74            | IFT81                        |
| IFT139                                                                                                                                                                | WDR34              | PKD1                                     | PKHD1               | OFD2                   | ALSM1                        |
| STIL                                                                                                                                                                  | PCM-1              | FAPP2                                    | δ-TUBULIN           | CENTROBIN              | KIF24                        |
| <b>Cilia-associated genes with known functions in developmental pathways (vertebrate gene / Drosophila ortholog)</b>                                                  |                    |                                          |                     |                        |                              |
| NPHP2, INVERSIN / CG12342, Dgo                                                                                                                                        |                    | FUZ / CG13396, Fuzzy                     |                     | aPKC / CG10261, aPKC   |                              |
| KIF7 / CG1708, Costal-2                                                                                                                                               |                    | PAR3 / CG5055, Bazooka                   |                     | CRB3 / CG6383, Crumbs  |                              |
| INTU / CG16993, Inturned                                                                                                                                              |                    | PAR6 / CG5884, PAR6                      |                     | GSK3β / CG2621, Shaggy |                              |

***Bold+Italic*** confirmed with independent RNAi line, **Bold** confirmed with overlapping RNAi line, *Italic* not confirmed by 2<sup>nd</sup> RNAi line, NA: not available, ( ) penetrance less than 50%, mch stands for multiple cellular hairs, <sup>v</sup> vdr collection, <sup>d</sup> dgrc kyoto collection, <sup>t</sup> trip collection, <sup>MS</sup> made in our lab

## **Experimental procedures**

### ***Antibodies***

For tissue staining, primary antibodies include guinea pig anti-Senseless (1:500, gift from H. Bellen), mouse anti-Wingless (1:500, DSHB 4D4 concentrate), mouse anti-Armadillo (1:10, DSHB 7A1), rat anti-DE-cad (DSHB DCAD2), rat anti-Distalless (1:250, (Wu and Cohen, 2000), mouse anti-myc (1:200, Santa Cruz, 9E10), rabbit anti-myc (1:200, Santa Cruz, d1-717), mouse anti-Ptc (1:50, DSHB 5E10), rat anti-Ci (1:500, DSHB 2A1 concentrate), rabbit anti-beta-galactosidase (1:500, Molecular Probes A11132), mouse anti-acetylated tubulin (1:2, gift from C. Iomini). For immunoblotting, the following primary antibodies were used: mouse anti-Armadillo (1:1000, DSHB 7A1), mouse anti- $\gamma$ -tubulin (1:1000, Sigma), mouse anti-GFP (1:1000, Roche), rabbit anti-cleaved Caspase-3 (D175, Cell Signaling). Fluorescent secondary antibodies and HRP-coupled secondary antibodies were from Jackson Laboratories.

### ***Transgenic flies and plasmids pUAS-IFT122-myc and pUAS-IFT43-myc***

To generate UAS-IFT122-myc transgenic flies, Myc tag was added to the C-term of IFT122 sequence by PCR amplification using DGRC SD05642 cDNA clone and cloned into pUAS vector using NotI and XbaI sites. The following primers were used: 5'-GCGGCCGCTATGAGGGGTGTTCTCAAGTGG-3' and 5'-GCTCTAGACTACAGATCTTCTTCAGAAATAAGTTTTTGTTCAAAGTCTTCCATCAGCTTTTCGG-3'.

To generate UAS-IFT43-myc transgenic flies, Myc tag was added to the C-term of IFT43-myc sequence by PCR amplification using DGRC SD05240 cDNA clone and cloned into pUAS<sub>t</sub> vector using NotI and XbaI sites. The following primers were used: 5'-GCGGCCGCTATGGACTGGGCCGAAGAAC-3' and 5'-GCTCTAGACTACAGATCTTCTTCAGAAATAAGTTTTTGTTCAGTATATTGTGTGGGTGGAATC-3'.

### ***CRISPR mutant oseg4***

We used the protocols from (Kondo and Ueda, 2013) to construct a double-gRNA vector. The primers used to insert gRNA into pBfV-U6.2B were: U6.2-oseg4-ex3-1F 5'-CTTCGTACAGATGACACTCCCCGT-3', U6.2-oseg4-ex3-1R 5'-AAACACGGGGAGTGTTCATCTGTAC-3', U6.2B-oseg4-ex8-1F 5'-CTTCGCGGAGATATCAGCCTTCTA-3' and U6.2B-oseg4-ex8-1R 5'-AAACTAGAAGGCTGATATCTCCGC-3'. This construct was then injected in the TBX-0002 *y<sup>1</sup> v<sup>1</sup> P{nos-phiC31\int.NLS}X; attP40* fly stock and crossed with CAS-0002 *y<sup>2</sup> cho<sup>2</sup> v<sup>1</sup> P{nos-Cas9, y+, v+}1A/FM7c, KrGAL4 UAS-GFP* for generation of CRISPR mutant. Mutants were selected by non lethal genotyping (Carvalho et al., 2009) and amplification of the targeted region by PCR.



## References

Carvalho, G.B., Ja, W.W., and Benzer, S. (2009). Non-lethal PCR genotyping of single *Drosophila*. *BioTechniques* 46, 312–314.

Kondo, S., and Ueda, R. (2013). Highly improved gene targeting by germline-specific Cas9 expression in *Drosophila*. *Genetics* 195, 715–721.

Wu, J., and Cohen, S.M. (2000). Proximal distal axis formation in the *Drosophila* leg: distinct functions of *teashirt* and *homothorax* in the proximal leg. *Mechanisms of Development* 94, 47–56.
